# Supplementary material for: Heart-Focused Anxiety, General Anxiety, Depression and Health-Related Quality of Life in Patients with Atrial Fibrillation Undergoing Pulmonary Vein Isolation
Source: MDPI journal article supplement (doi:10.3390/jcm11071751), 2022-03-22
Supplement: s1 [file s1]

## Supplementary Materials

**Table S1.** Cut-off scores for the Cardiac Anxiety Questionnaire (CAQ).

|                    |     | Age dependent |       |       |       |
|--------------------|-----|---------------|-------|-------|-------|
|                    |     | 18-43         | 44-54 | 55-66 | 67-92 |
| CAQ                | 0-4 |               |       |       |       |
| Total (male)       |     | 0.94          | 1.41  | 1.70  | 1.92  |
| Total (female)     |     | 1.21          | 1.35  | 1.82  | 2.00  |
| Fear (male)        |     | 1.25          | 1.50  | 1.88  | 1.96  |
| Fear (female)      |     | 1.50          | 1.50  | 2.00  | 2.13  |
| Attention (male)   |     | 1.00          | 1.60  | 2.00  | 2.10  |
| Attention (female) |     | 1.20          | 1.40  | 1.82  | 2.20  |
| Avoidance (male)   |     | 1.25          | 1.50  | 2.00  | 2.75  |
| Avoidance (female) |     | 1.50          | 2.00  | 2.00  | 2.75  |

CAQ: Cardiac Anxiety Questionnaire. Cut-off scores refer to Fischer et al. for CAQ [15].
